# Supplementary material for: Multiplex Ultrasensitive Genotyping of Patients with Non-Small Cell Lung Cancer for Epidermal Growth Factor Receptor (EGFR) Mutations by Means of Picodroplet Digital PCR
Source: PubMed Central journal article supplement (PMC5514407; doi:10.1016/j.ebiom.2017.06.003), 2017-06-07

## Supplemental Text

### **Multiplex Ultrasensitive Genotyping of Patients with Non–Small Cell Lung Cancer for Epidermal Growth Factor Receptor (EGFR) Mutations by Means of Picodroplet Digital PCR**

#### **Supplementary Figure Legends**

**Supplemental Fig. 1. Serial dilutions of positive control plasmid were measured for each of the EGFR mutation.** (A) Two-dimensional histogram of the 6-hexaplex assay is shown. (B) Individual experiments are displayed as diamond, square, or triangles, which correspond to three independent dilution series experiments, which were measured for each target. FAM, 6-carboxyfluorescein; TET, tetrachlorofluorescein.

**Supplemental Fig. 2. False positive droplet events.** For each of the 3 EGFR mutation targets, the distribution of false positives was measured from a pooled collection of wild type plasmid samples, commercial human normal genomic DNA, and genomic DNA from negative cell line. A Poisson model was applied to fit the false positive distribution. The table in the lower right reports the number of pooled experiments used in the limit

of blank (LOB) determined from the 95% confidence interval of the Poisson model fit (Bottom right panel).

**Supplemental Fig. 3. False positive droplet events and amount of DNA.** (A)

Multiplex analysis of DNA isolated from a FFPE sample of EGFR L858R negative and exon19 deletion positive sample (left, input DNA was approximately 184.9 ng), EGFR L858R positive and exon19 deletion negative sample (middle, input DNA was approximately 114.7 ng) and EGFR exon19 deletion positive and T790M negative sample (right, input DNA was approximately 110.3 ng). (B) Correlation between the quantity of amplifiable DNA and the number of mutant alleles per assay for EGFR L858R (left), exon19 deletion (middle) and T790M (right).

**Supplemental Fig. 4.** False positive rate of multiplex ddPCR assay. For the EGFR

L858R (A), exon19 deletion (B), or T790M (C) mutation targets, the distribution of false positives was measured from a pooled collection of mutation negative samples. A Poisson model was applied to fit the false positive distribution. The table in D reports the number of pooled experiments used in the limit of blank (LOB) determined from the 95% confidence interval of the Poisson model fit.

**Supplemental Fig. 5. Analysis of an identical sample with duplex and multiplex assays.** Multiplex analysis of DNA isolated from a FFPE sample of EGFR L858R mutant (A), exon19 deletion mutant (B) and KRAS mutant (C) samples with NSCLC. Duplex analyses of identical DNA samples from each patient are shown in right three panels.

**Supplemental Fig. 6. Comparison of results obtained by multiplex and duplex analyses on fraction of wild type DNA.** Compilation of the analysis of FFPE samples from patients with primary tumors mutated for EGFR L858R, exon19 deletion (ex19del) with/without T790M mutation.

**Supplemental Table 1. Primers and probes used for droplet digital PCR (ddPCR).**

| Target mutation | Primers | Sequence                         |
|-----------------|---------|----------------------------------|
| L858R           | Forward | 5'-GCAGCATGTCAAGATCACAGATT-3'    |
|                 | Reverse | 5'-CCTCCTTCTGCATGG TATTCTTTCT-3' |
| Exon19 del      | Forward | 5'-GCACCATCTCACAATTGCCAG-3'      |
|                 | Reverse | 5'-CACAGCAAAGCAGAAACTCACA-3'     |
| T790M           | Forward | 5'-GCAGCATGTCAAGATCACAGA TT-3'   |
|                 | Reverse | 5'-CCTCCTTCTGCATGGTATTCTTTC T-3' |

| Target mutation | Probes                 | Reporter dye | Quenchers  | Sequence                       | Concentration (nM) |
|-----------------|------------------------|--------------|------------|--------------------------------|--------------------|
| L858R           | Wild-type (2573T)      | TET          | ZEN/IABkFQ | 5'-AGTTTGGCCAGCCCAA-3'         | 200                |
|                 | L858R mutant (2573T>G) | TET          | ZEN/IABkFQ | 5'-AGTTTGGCCCGCCCAA-3'         | 40                 |
|                 | L858R mutant (2573T>G) | FAM          | ZEN/IABkFQ | 5'-AGTTTGGCCCGCCCAA-3'         | 200                |
| Exon19 del      | Wild-type              | TET          | ZEN/IABkFQ | 5'-TATGTTGCTTCTCTTAATTCC-3'    | 200                |
|                 | Reference              | FAM          | ZEN/IABkFQ | 5'-CAGAAGGTGAGAAAGTT-3'        | 200                |
| T790M           | Wild-type (2369C)      | TET          | ZEN/IABkFQ | 5'-T+CATC+A+C+GC/ZEN/A+GCTC-3' | 200                |
|                 | T790M mutant (2369C>T) | FAM          | ZEN/IABkFQ | 5'-T+CATC+A+T+GCA+GC+TC-3'     | 200                |

\* + indicates Locked Nucleic Acids (LNA).

## Supplemental Table 2. PCR conditions

| Duplex: EGFR L858R |                  |        |
|--------------------|------------------|--------|
| Cycle              | Temperature (°C) | Hold   |
| 1                  | 95               | 10 min |
|                    | 60               | 2 min  |
| 45                 | 95               | 30 sec |
|                    | 60               | 1 min  |
| 1                  | 98               | 10 min |
|                    | 10               | ∞      |

| Duplex: EGFR exon19 deletion |                  |        |
|------------------------------|------------------|--------|
| Cycle                        | Temperature (°C) | Hold   |
| 1                            | 95               | 10 min |
|                              | 60               | 2 min  |
| 45                           | 98               | 30 sec |
|                              | 60               | 2 min  |
| 1                            | 98               | 10 min |
|                              | 10               | ∞      |

| Duplex: EGFR T790M |                  |        |
|--------------------|------------------|--------|
| Cycle              | Temperature (°C) | Hold   |
| 1                  | 95               | 10 min |
| 45                 | 95               | 15 sec |
|                    | 58               | 15 sec |
|                    | 60               | 45 sec |
| 1                  | 98               | 15 min |
|                    | 10               | ∞      |

| Multiplex |                  |        |
|-----------|------------------|--------|
| Cycle     | Temperature (°C) | Hold   |
| 1         | 95               | 10 min |
| 45        | 95               | 30 sec |
|           | 58               | 15 sec |
|           | 60               | 75 sec |
| 1         | 98               | 15 min |
|           | 10               | ∞      |

**A**

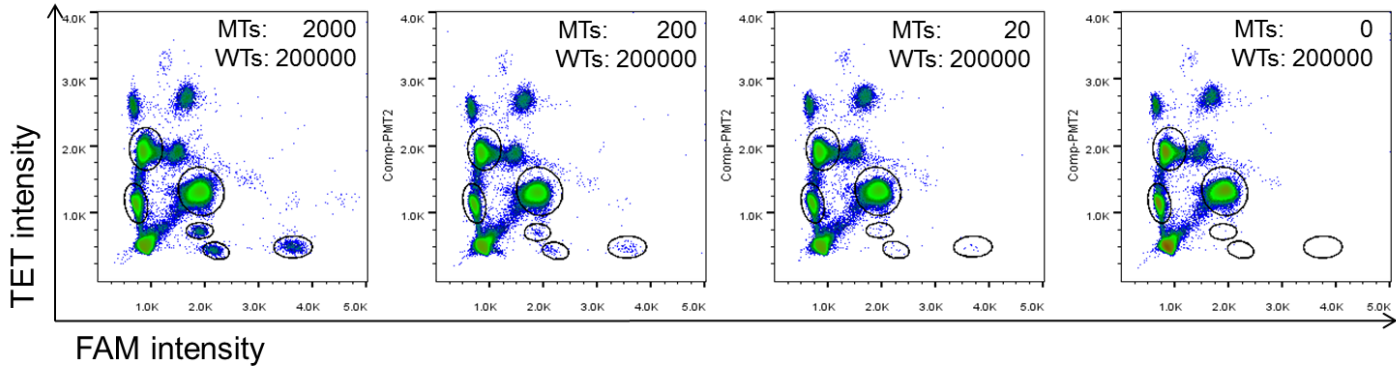

**B**

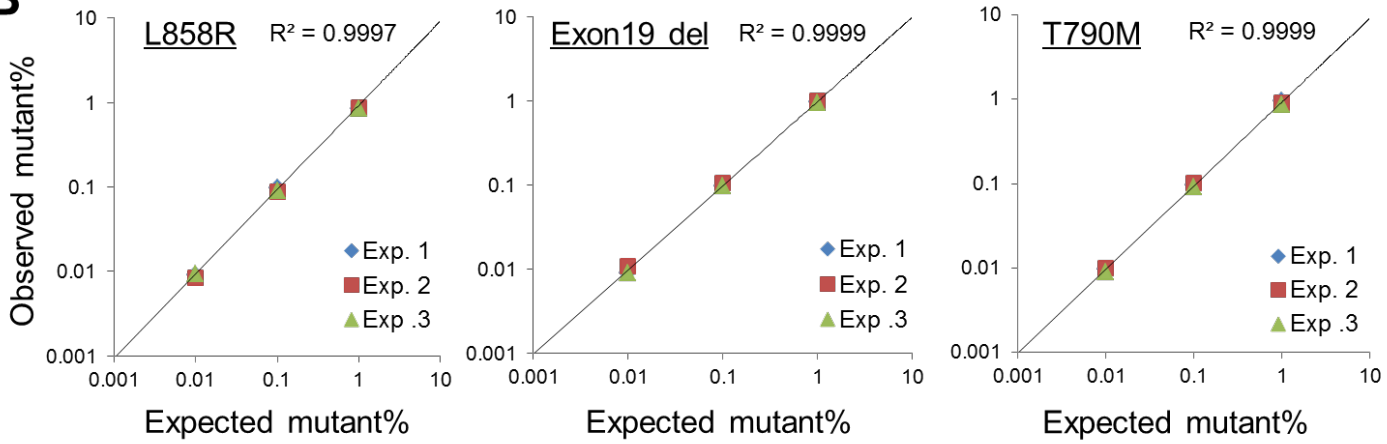

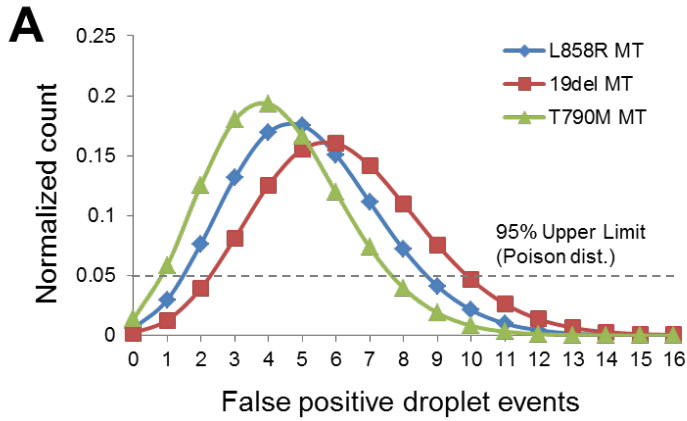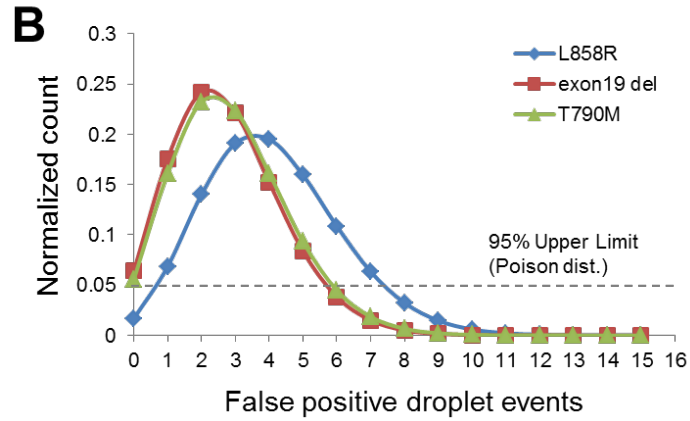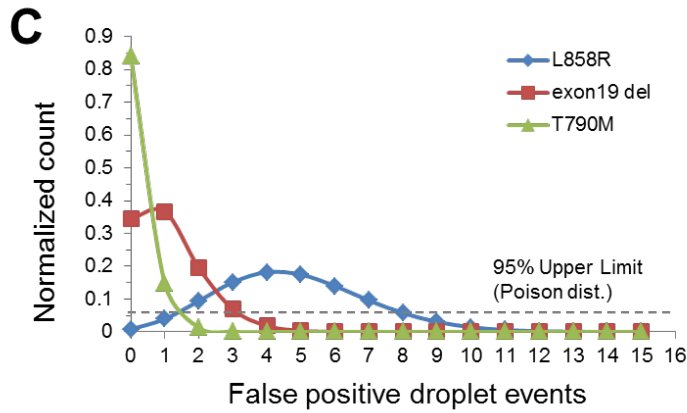

**D**

| Template DNA ( $n = 8$ ) | Limit of blank (LOB)/assay |          |       |
|--------------------------|----------------------------|----------|-------|
|                          | L858R                      | Ex19 del | T790M |
| Wild-type plasmid        | 9                          | 10       | 7     |
| Human normal gDNA        | 8                          | 6        | 6     |
| A549 gDNA                | 9                          | 4        | 2     |

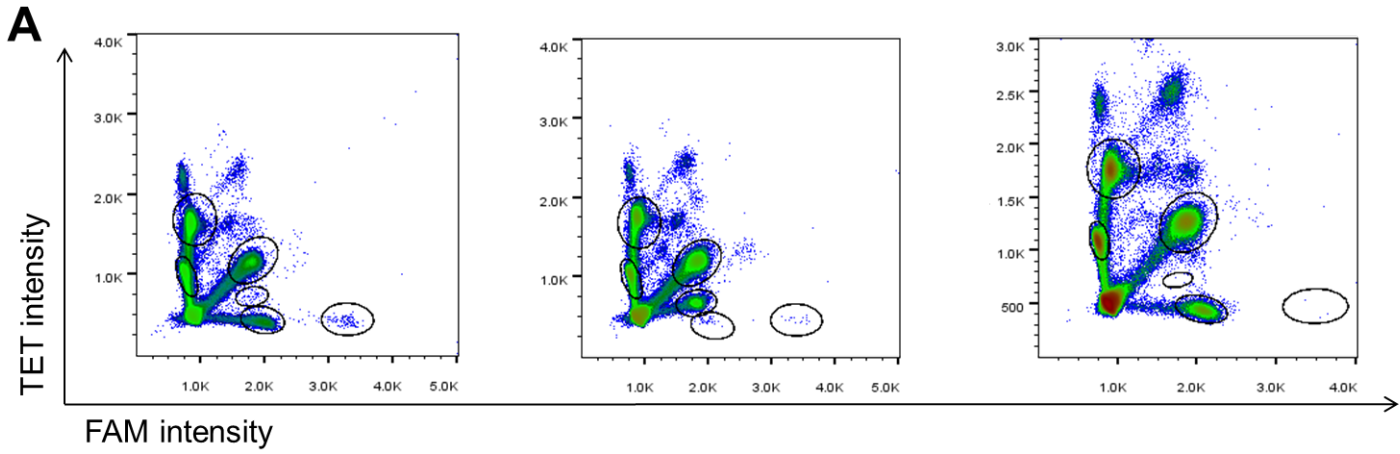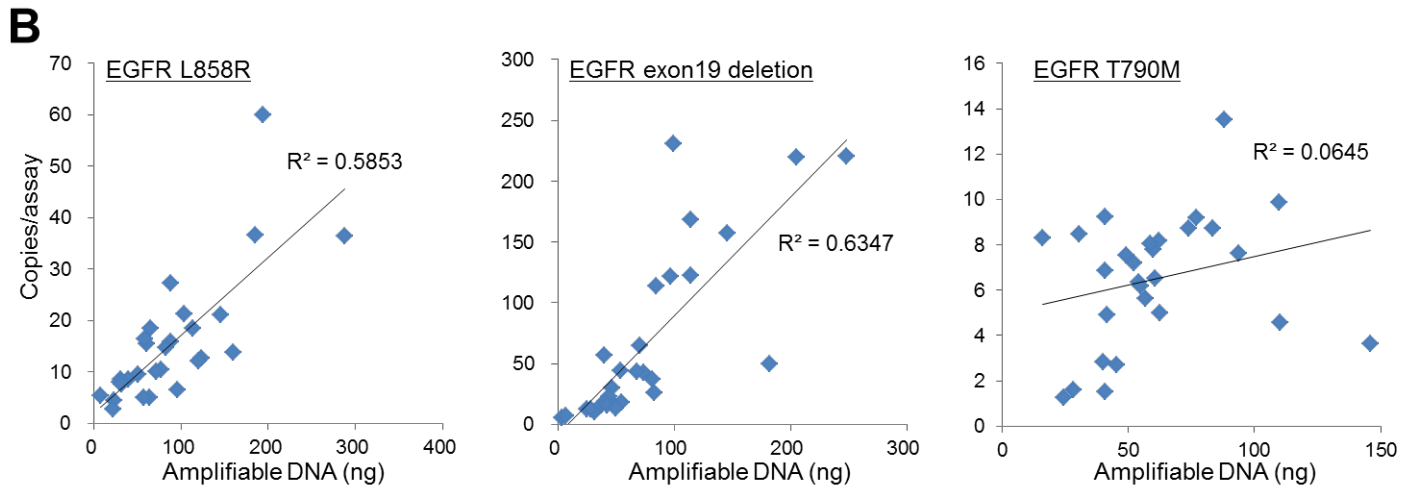



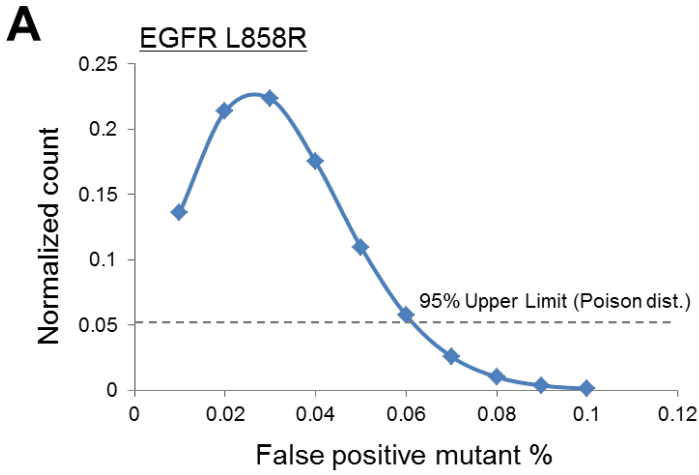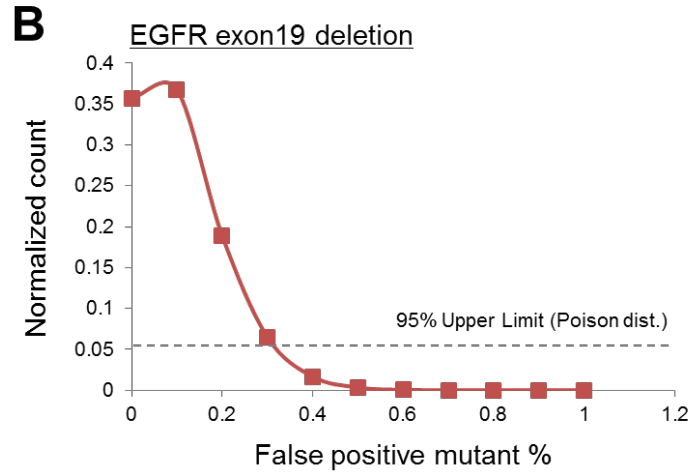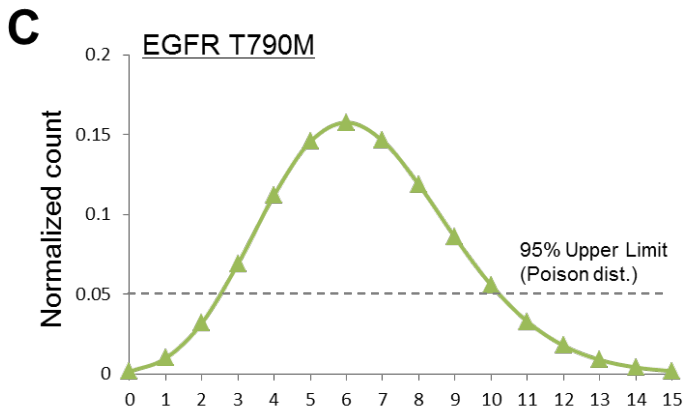

**D**

|                                                           | Limit of blank (LOB) |                   |                  |
|-----------------------------------------------------------|----------------------|-------------------|------------------|
|                                                           | L858R<br>(n = 29)    | Ex19del<br>(n=28) | T790M<br>(n=28)  |
| Genome DNA from EGFR activation mutation negative samples | 0.07%                | 0.4%              | 11 copies /assay |

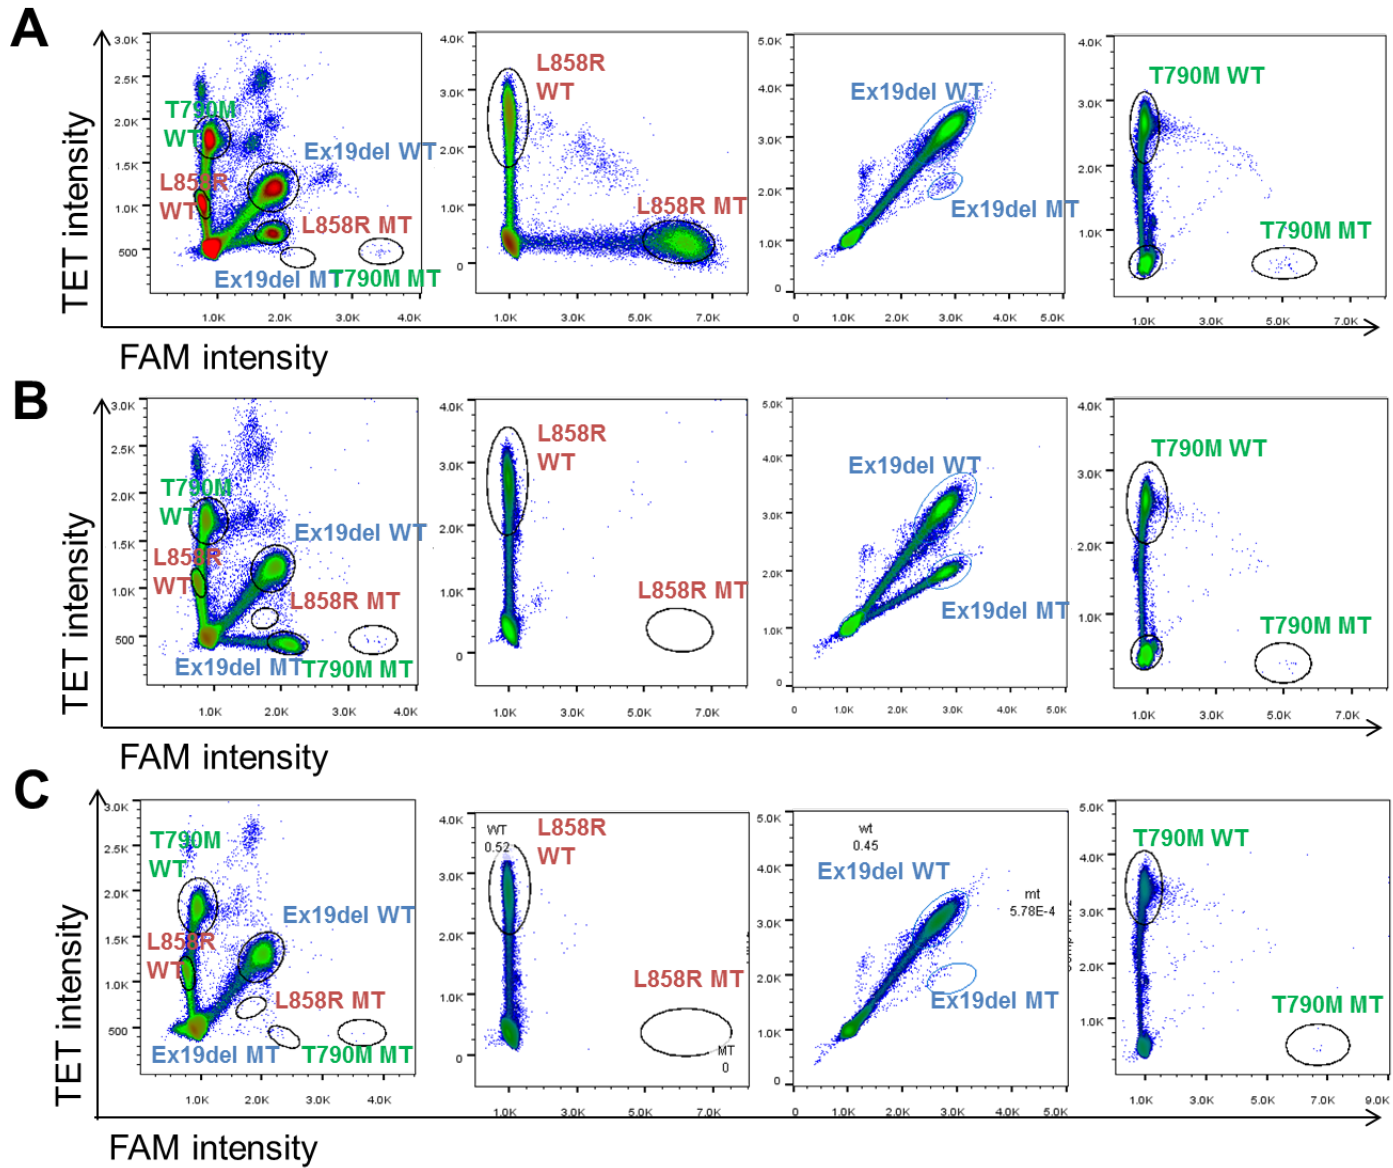

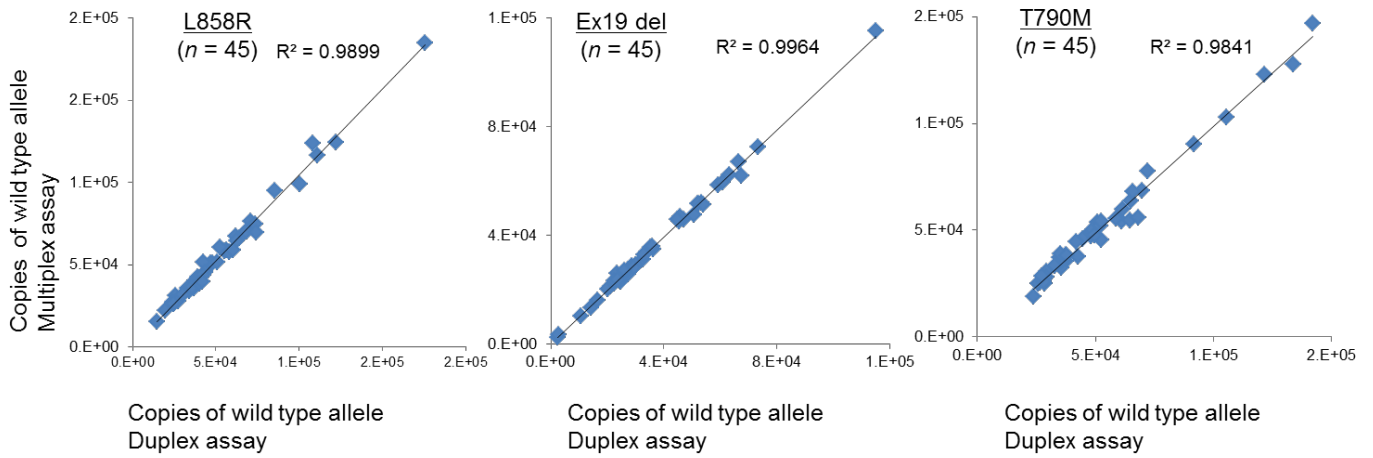

Supplement: mmc1.pdf [file mmc1.pdf]
